# Supplementary material
Source: PubMed Central journal article supplement (PMC7857437)
Supplement: EMBR-22-e50927-s001.pdf [file EMBR-22-e50927-s001.pdf]

## Expanded View Figures

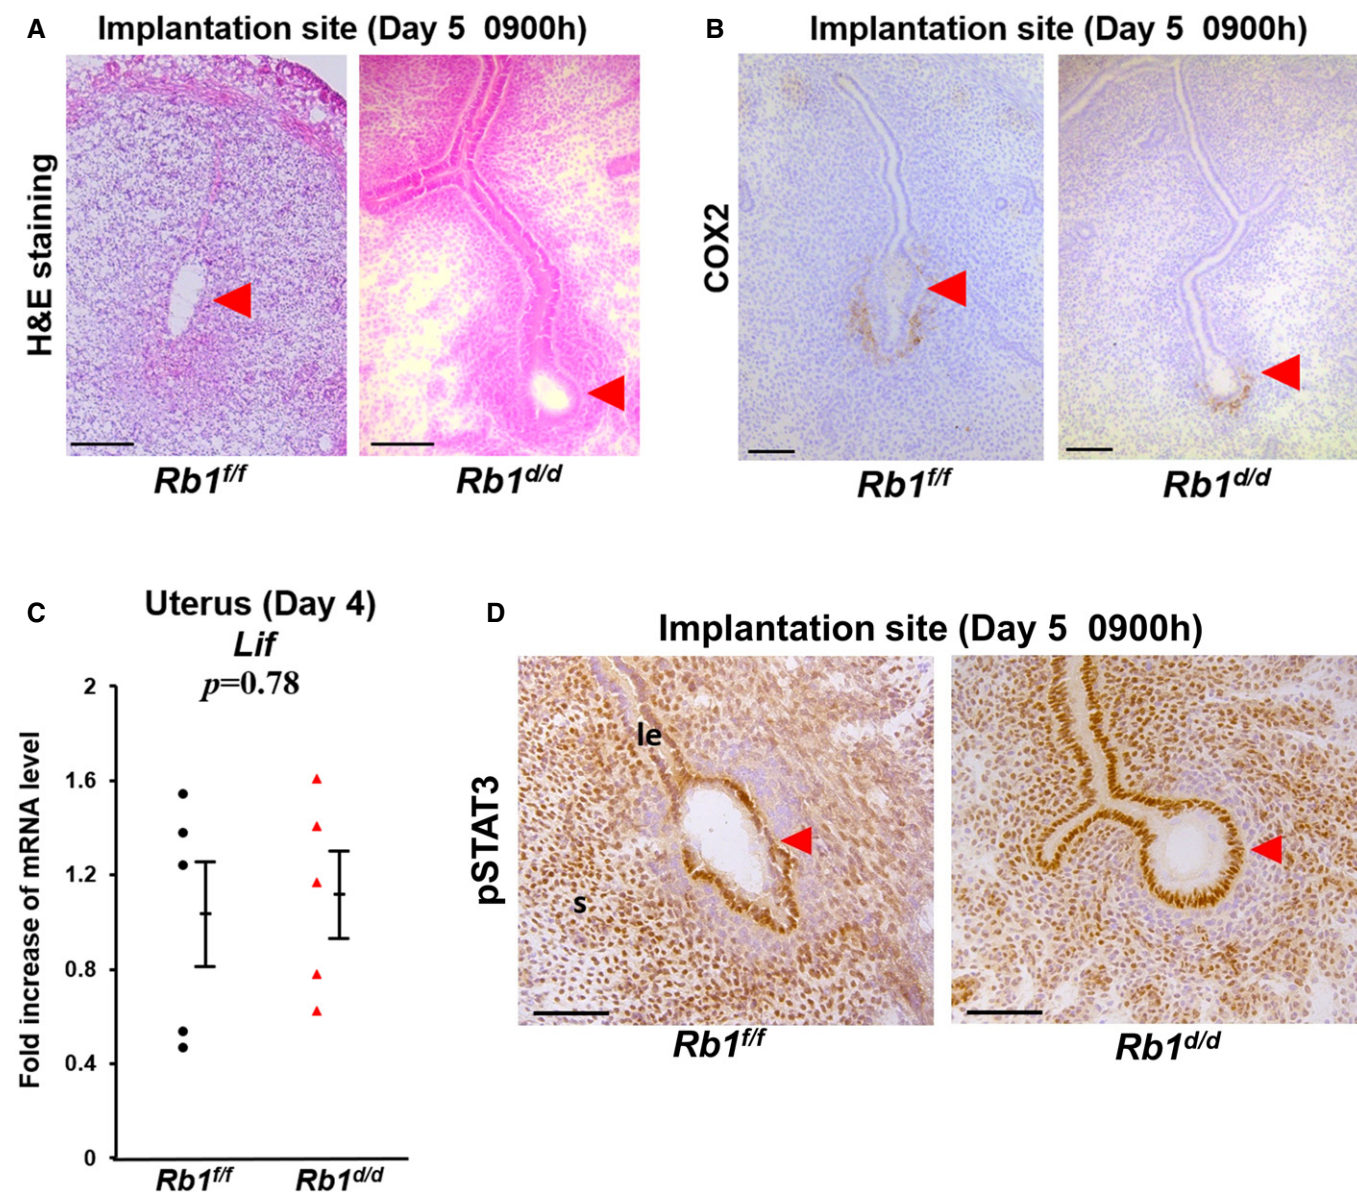

**Figure EV1. Embryo attachment occurs normally in *Rb1<sup>d/d</sup>* mice.**

A H&E staining of implantation sites in *Rb1<sup>f/f</sup>* and *Rb1<sup>d/d</sup>* mice at 09:00 h on day 5 of pregnancy. Scale bar = 100  $\mu$ m; arrowhead, embryo.

B Immunostaining of COX2, a marker of embryo attachment reaction in the implantation sites of *Rb1<sup>f/f</sup>* and *Rb1<sup>d/d</sup>* mice at 09:00 h on day 5 of pregnancy. Scale bar = 100  $\mu$ m; arrowhead, embryo.

C Uterine expression of *Lif* mRNA on day 4 of pregnancy was comparable between *Rb1<sup>f/f</sup>* and *Rb1<sup>d/d</sup>* mice (mean  $\pm$  SEM, Student's *t*-test; *n* = 5 mice for each group).

D Immunostaining of pSTAT3, a marker of activated LIF signaling in the implantation sites of *Rb1<sup>f/f</sup>* and *Rb1<sup>d/d</sup>* mice at 09:00 h on day 5 of pregnancy. Scale bar = 100  $\mu$ m; le, luminal epithelium; s, stroma; arrowhead, embryo.

Data information: le, luminal epithelium; s, stroma

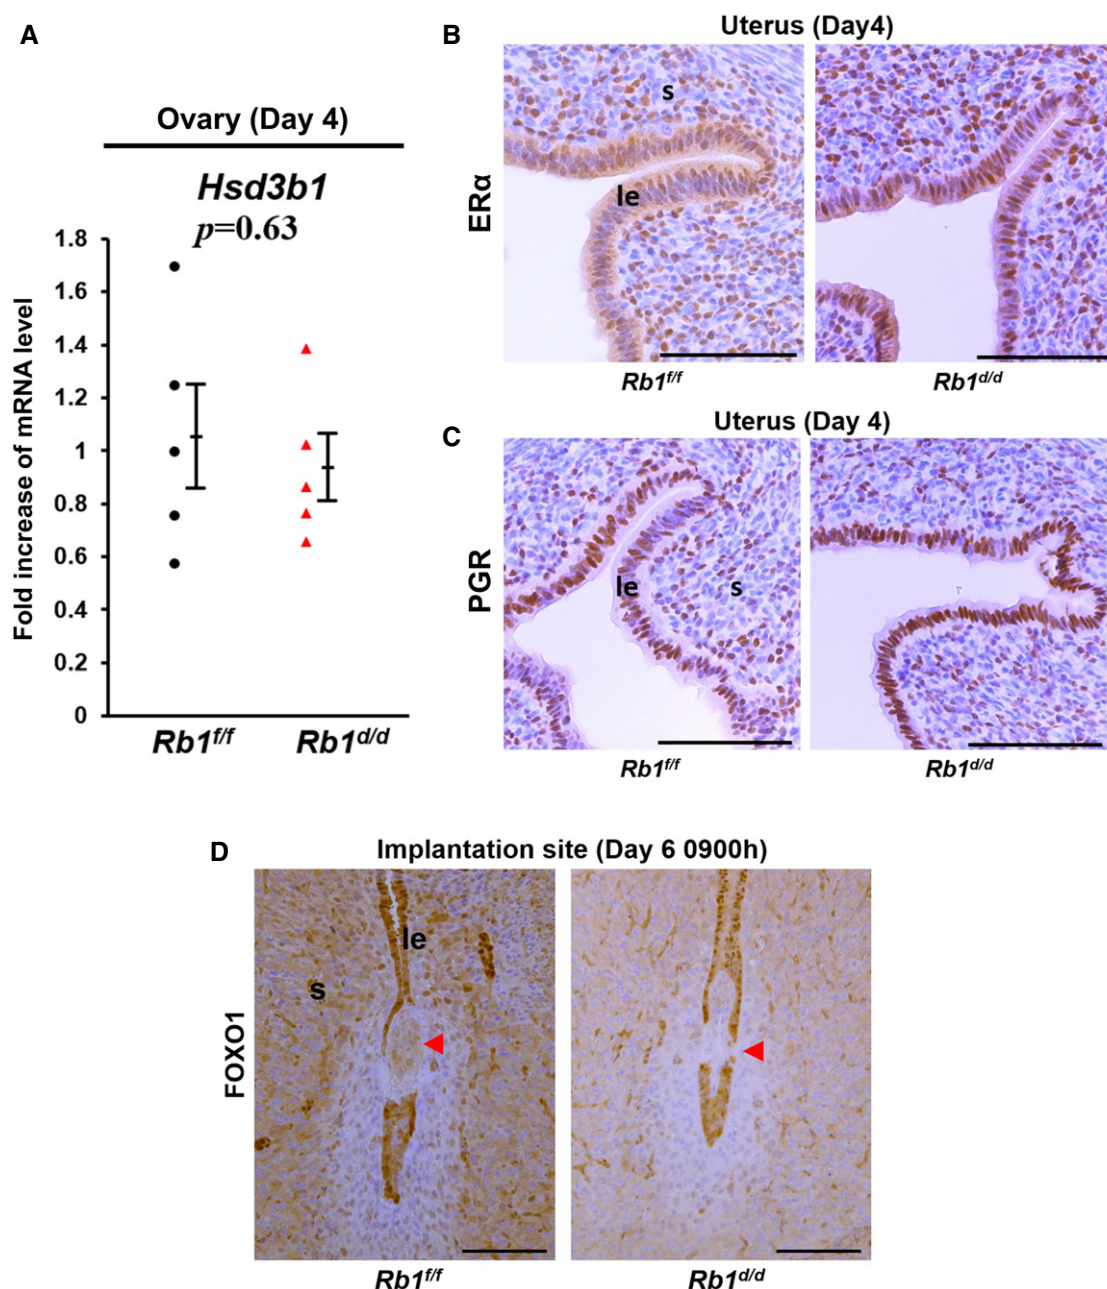

**Figure EV2.** Normal expressions of ovarian *Hsd3b1* mRNA and uterine estrogen receptor  $\alpha$  (ER $\alpha$ ), progesterone receptor (PGR), and FOXO1 proteins in  $Rb1^{d/d}$  mice.

- A Quantitative PCR demonstrated that ovarian expression of ovarian steroidogenic enzyme *Hsd3b1* mRNA was comparable between  $Rb1^{f/f}$  and  $Rb1^{d/d}$  mice on day 4 of pregnancy (mean  $\pm$  SEM, Student's *t*-test;  $n = 5$  mice for each group).
- B, C Immunohistochemistry demonstrated that uterine expression of ER $\alpha$  and PGR was comparable between  $Rb1^{f/f}$  and  $Rb1^{d/d}$  mice on day 4 of pregnancy. Scale bar = 100  $\mu$ m.
- D Immunohistochemistry demonstrated that uterine expression of FOXO1 was comparable between  $Rb1^{f/f}$  and  $Rb1^{d/d}$  mice on day 6 of pregnancy. Scale bar = 100  $\mu$ m; arrowhead, embryo.

Data information: le, luminal epithelium; s, stroma.

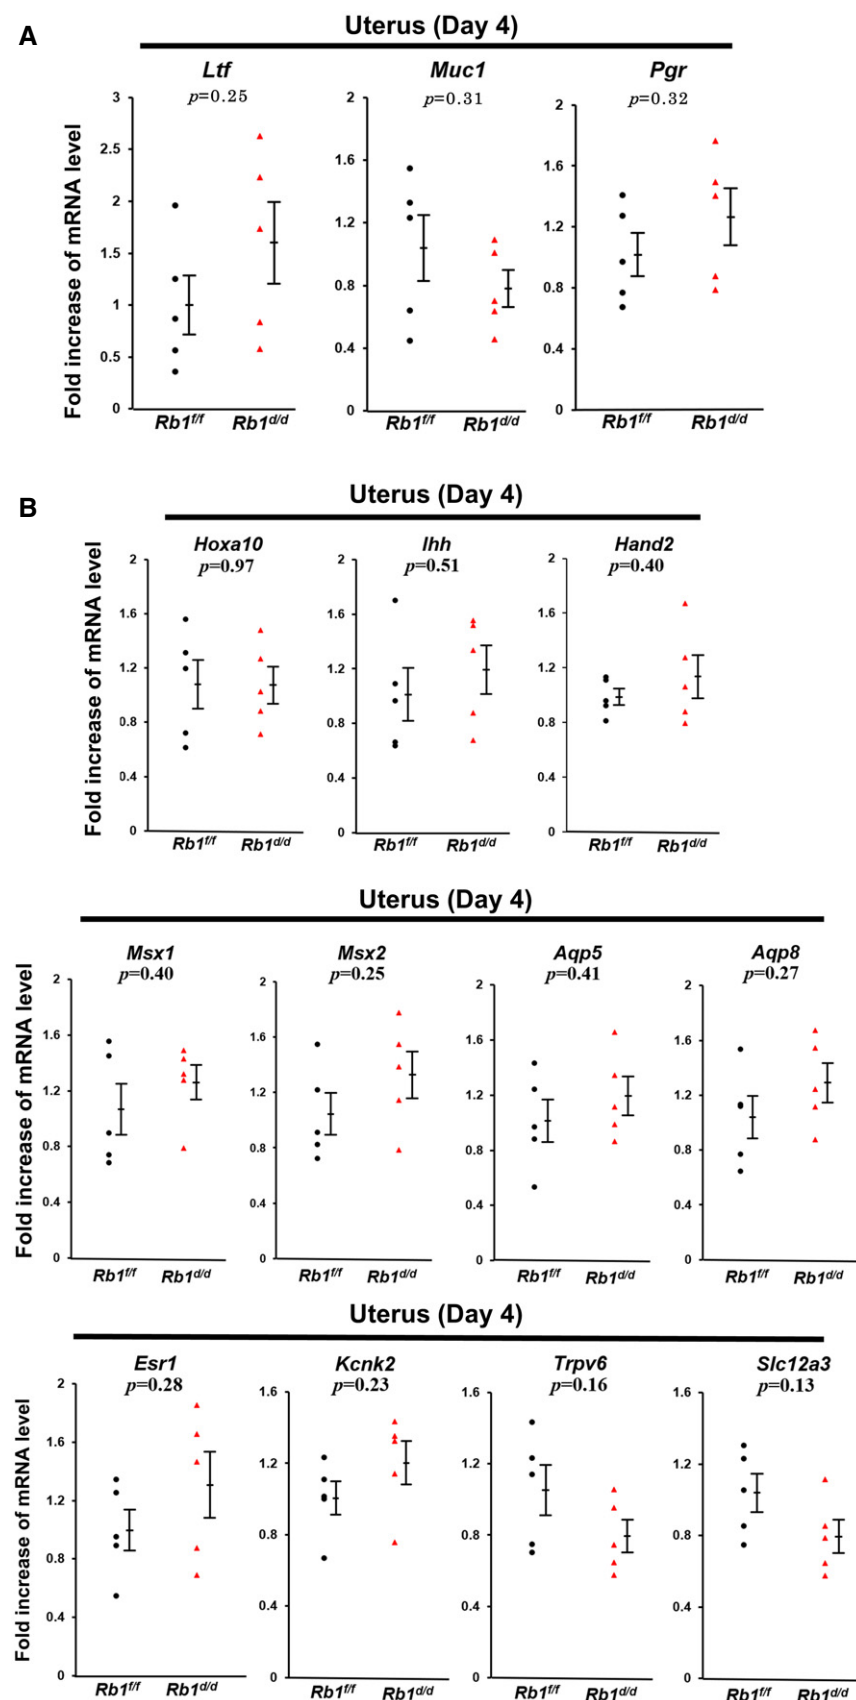

**Figure EV3. Comparable uterine expressions of E<sub>2</sub>-responsive and P<sub>4</sub>-responsive genes in *Rb1<sup>fl/fl</sup>* and *Rb1<sup>d/d</sup>* mice on day 4 of pregnancy.**

A, B Quantitative PCR demonstrated that uterine expression of E<sub>2</sub>-responsive (A) and P<sub>4</sub>-responsive genes (B) was comparable between *Rb1<sup>fl/fl</sup>* and *Rb1<sup>d/d</sup>* mice on day 4 of pregnancy (mean ± SEM, Student's *t*-test; *n* = 5 mice for each group).

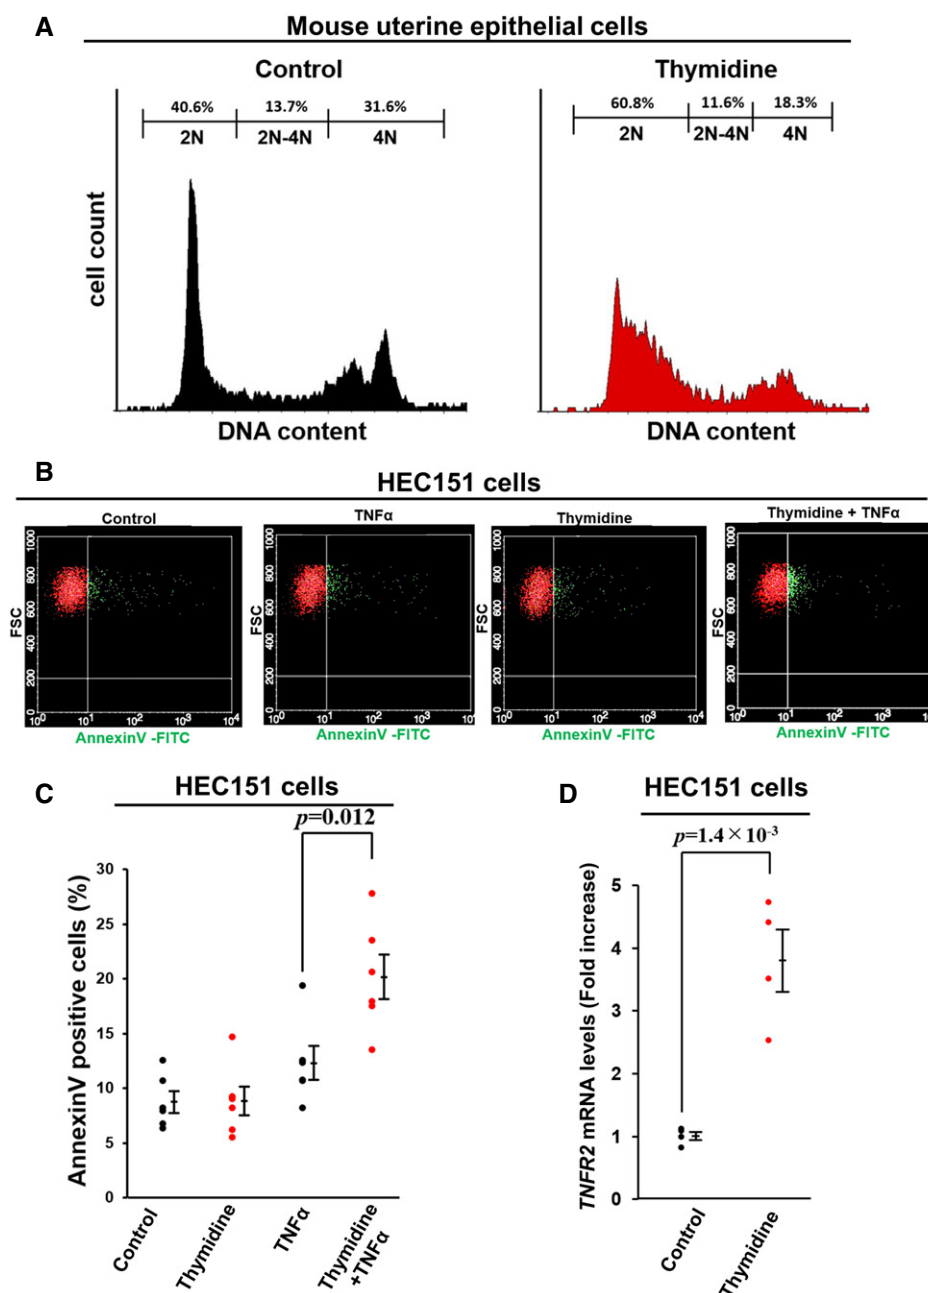

**Figure EV4. Thymidine-induced cell cycle arrest in primary mouse epithelial cells and HEC151 endometrial epithelial cell line.**

- A** Thymidine-induced cell cycle arrest in primary mouse epithelial cells. Mouse uterine epithelial cells were stained with propidium iodide, and cell fractions were quantified by flow cytometry.
- B, C** Annexin V assay using a human endometrial epithelial cell line HEC151 showed that  $\text{TNF}\alpha$  administration increases the expression of annexin V in growth-arrested HEC151 cells with thymidine treatment, but does not in the control cells (mean  $\pm$  SEM, Student's *t*-test). The assay was performed in duplicate for each group, and the examination was performed three times.
- D** The expression of TNF receptor type 2 (TNFR2) was upregulated in growth-arrested HEC151 cells with thymidine treatment (mean  $\pm$  SEM, Student's *t*-test). Quantitative PCR was performed in quadruplicate for each group.

**Figure EV5. RNA-seq analyses using uterine epithelium of *Rb1<sup>ff/ff</sup>* and *Rb1<sup>d/d</sup>* mice on day 4 of pregnancy.**

- A Day 4 uteri were collected from *Rb1<sup>ff/ff</sup>*, *Rb1<sup>d/d</sup>*, P<sub>4</sub>-primed *Rb1<sup>ff/ff</sup>*, and P<sub>4</sub>-primed *Rb1<sup>d/d</sup>* mice. As for P<sub>4</sub>-primed *Rb1<sup>ff/ff</sup>* and *Rb1<sup>d/d</sup>* mice, pre-implantation P<sub>4</sub> treatment (2 mg/mouse/day) was performed on days 2 and 3 of pregnancy. RNA-seq was performed using the uterine luminal epithelium dissected out by laser capture microdissection. The heatmaps depicted log<sub>2</sub> fold enrichment of differentially expressed genes (DEGs) among the uterine epithelium. Clusters were defined by k-means clustering. Each DEG has a log<sub>2</sub> fold change > |1| in at least one group comparing to others. Numbers shown in right indicate different gene clusters and numbers of DEGs in each cluster.
- B Gene regulatory systems in the gene cluster 6 in which the transcripts are poorly expressed in *Rb1<sup>d/d</sup>* mice without P<sub>4</sub> supplementation compared with other groups were predicted in Enrichr by comparing our data with publicly available datasets as for transcriptional factors. DEGs in the cluster 6 were highly correlated with cell cycle-related TFs such as serum response factor (SRF) and E2F8.
- C GO terms analyses by Enrichr for the cluster 6 demonstrated that the genes related to epithelial differentiation and inhibition of cell proliferation are downregulated in the luminal epithelium of *Rb1<sup>d/d</sup>* mice without P<sub>4</sub> treatment.
- D The heatmap of cell cycle-related genes in the luminal epithelium of *Rb1<sup>ff/ff</sup>* and *Rb1<sup>d/d</sup>* mice with and without pre-implantation P<sub>4</sub> treatment was demonstrated. Cyclin-dependent kinase inhibitors CDKN2A (p21) and CDKN2C (p18) were upregulated in *Rb1<sup>ff/ff</sup>* and *Rb1<sup>d/d</sup>* mice with P<sub>4</sub> treatment compared with *Rb1<sup>d/d</sup>* mice without P<sub>4</sub> treatment. Yellow, blue, and black indicate high, intermediate, and low gene expression, respectively.
- E Immunohistochemistry of CDKN2C (p18) protein in the uterus of *Rb1<sup>ff/ff</sup>* and *Rb1<sup>d/d</sup>* mice with and without P<sub>4</sub> treatment. Same as transcriptome analysis, CDKN2C staining was intense in the uteri of *Rb1<sup>ff/ff</sup>* and *Rb1<sup>d/d</sup>* mice with P<sub>4</sub> treatment compared with *Rb1<sup>d/d</sup>* mice without P<sub>4</sub> treatment. Scale bar = 100 μm; le, luminal epithelium; s, stroma.

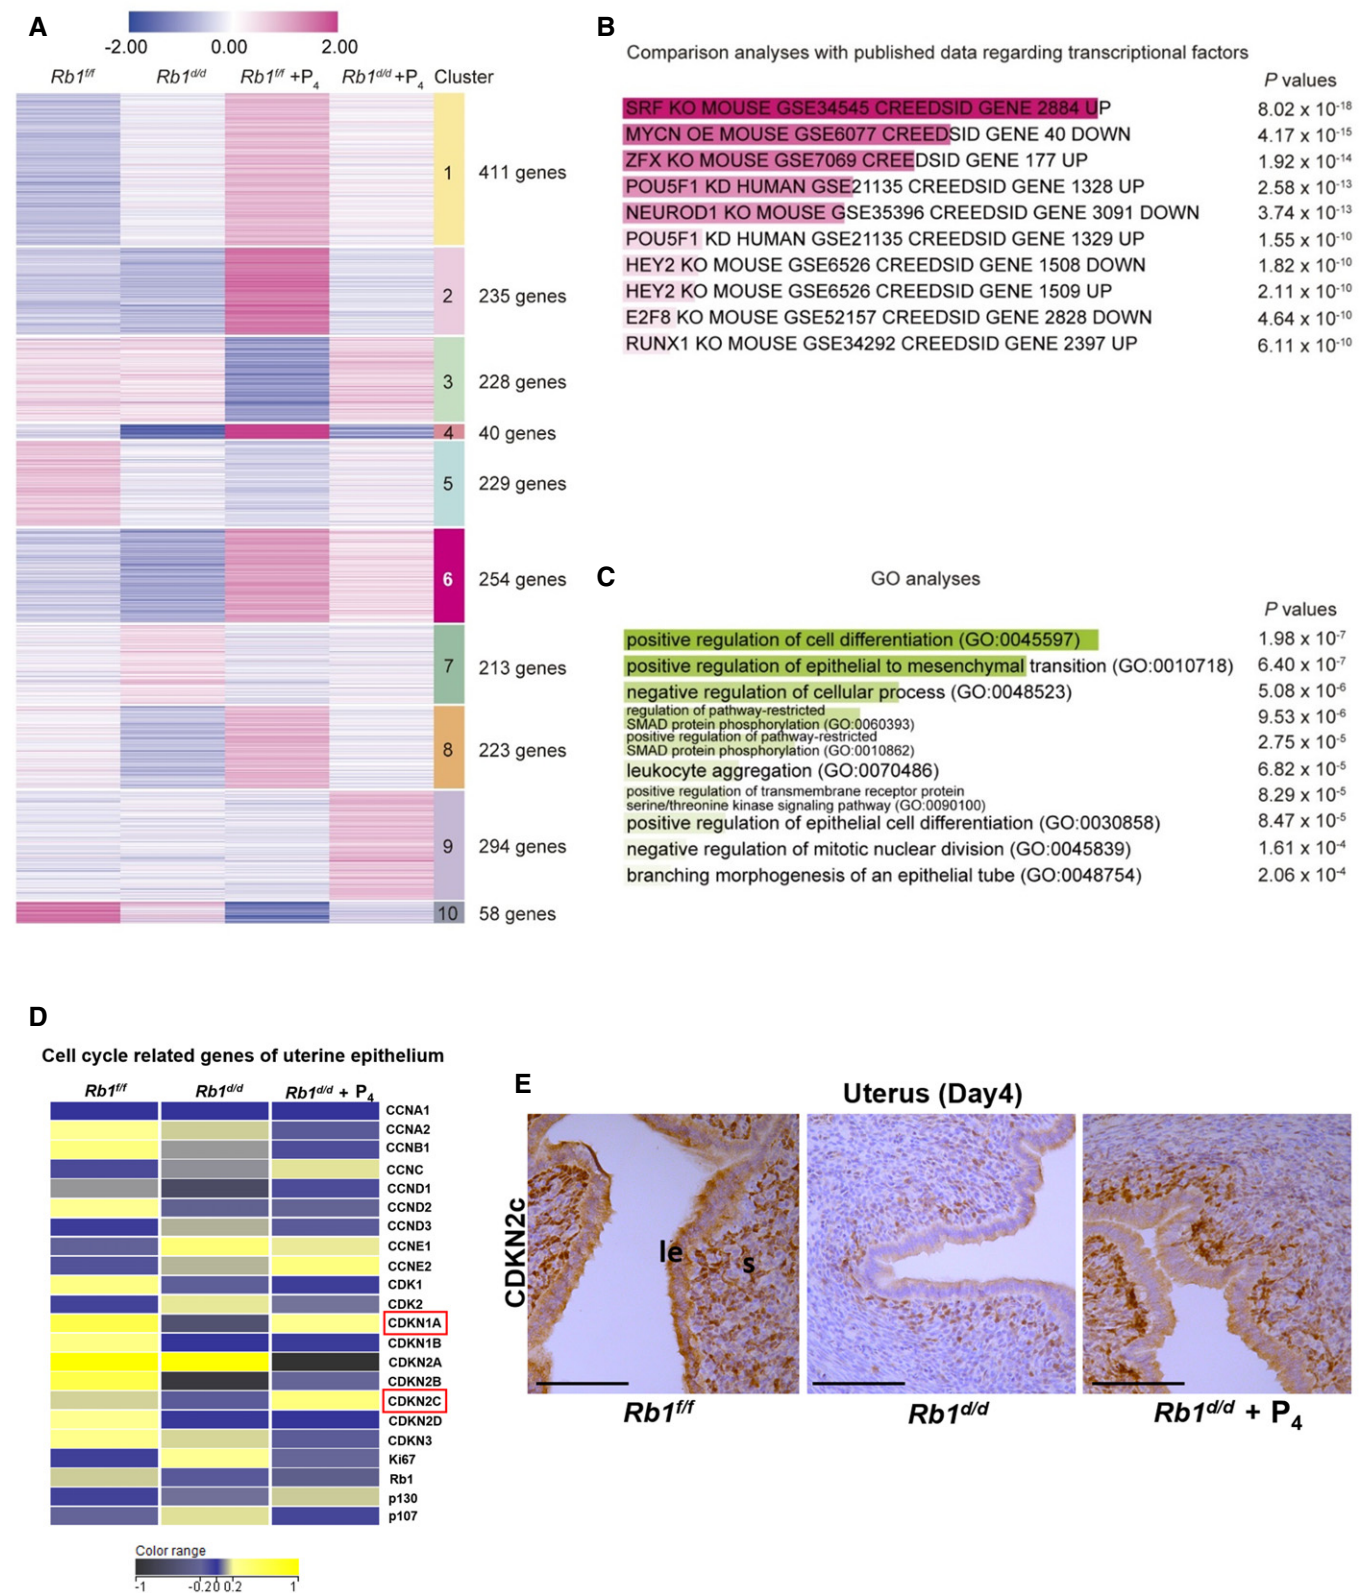

Figure EV5.
